# Supplementary material for: Efficacy of Probiotics in Rheumatoid Arthritis and Spondyloarthritis: A Systematic Review and Meta-Analysis of Randomized Controlled Trials
Source: MDPI journal article supplement (doi:10.3390/nu14020354), 2022-01-14
Supplement: s1 [file s1]

**Table S1.** Quality assessment based on Jadad score of randomized controlled trials reviewed.

| <b>Study</b>              | <b>Randomization</b> | <b>Blinding</b> | <b>Account of All Patients</b> | <b>Total</b> |
|---------------------------|----------------------|-----------------|--------------------------------|--------------|
| Alipour et al., 2014 [18] | 1                    | 2               | 1                              | 4            |
| Hatakka et al., 2003 [19] | 2                    | 1               | 1                              | 4            |
| Pineda et al., 2011 [21]  | 1                    | 2               | 1                              | 4            |
| Vadell et al., 2020 [20]  | 2                    | 0               | 1                              | 3            |
| Mandel et al., 2010 [23]  | 2                    | 1               | 1                              | 4            |
| Zamani et al., 2016 [24]  | 2                    | 1               | 1                              | 4            |
| Zamani et al., 2017 [25]  | 2                    | 1               | 1                              | 4            |
| Jenks et al., 2010 [26]   | 2                    | 2               | 1                              | 5            |
| Brophy et al., 2008 [27]  | 2                    | 2               | 1                              | 5            |
| Nenonen et al., 1998 [22] | 1                    | 0               | 1                              | 2            |

**Table S2.** Study results in spondylarthritis.

| Study                      | Outcome             | Intervention              |                            | Control                   |                            | Mean Difference<br>between Groups | <i>p</i> -Value<br>(Intervention vs.<br>Controls) |
|----------------------------|---------------------|---------------------------|----------------------------|---------------------------|----------------------------|-----------------------------------|---------------------------------------------------|
|                            |                     | Baseline                  | Versus End of<br>Treatment | Baseline                  | Versus End of<br>Treatment |                                   |                                                   |
| Jenks et al.<br>2010 [26]  | BASFI10<br>response | 3.5 (2.0)                 | vs. 2.9 (1.9)              | 3.6 (1.9)                 | vs. 3.1 (2.2)              | −0.1 (−0.7 to −0.6)               | <i>p</i> = 0.839                                  |
|                            | BASDAI              | 4.2 (2.2)                 | vs. 3.2 (2.1)              | 4.5 (2.0)                 | vs. 3.9 (2.2)              | −0.6 (−1.6 to −0.3)               | <i>p</i> = 0.182                                  |
|                            | ASAS20<br>response  | 6/32 (18.8%) <sup>a</sup> |                            | 9/31 (25.8%) <sup>a</sup> |                            |                                   | <i>p</i> = 0.338                                  |
|                            | VAS pain            | 2.9 (2.3)                 | vs. 2.7 (2.5)              | 3.0 (2.6)                 | vs. 2.6 (2.2)              | 0.2 (−0.8 to −1.1)                | NR                                                |
|                            | VAS fatigue         | 3.4 (2.2)                 | vs. 2.7 (2.0)              | 4.0 (2.4)                 | vs. 3.3 (2.4)              | −0.4 (−1.4 to −0.7)               | NR                                                |
|                            | ASQoL               | 6.9 (4.5)                 | vs. 4.9 (4.8)              | 6.4 (4.3)                 | vs. 5 (4.7)                | −0.5 (−2.0 to −1.1)               | NR                                                |
|                            | SJC                 | 0.4 (0.9)                 | vs. 0.25 (0.9)             | 0.5 (1.1)                 | vs. 0.2 (0.5)              | 0.1 (−0.2 to −0.4)                | NR                                                |
|                            | TJC                 | 2.0 (2.1)                 | vs. 3.1 (3.9)              | 2.6 (2.6)                 | vs. 5.4 (8.8)              | −1.6 (−4.6 to −1.5)               | NR                                                |
| Brophy et al.<br>2008 [27] | CRP                 | 6.8 (6.7)                 | vs. 6.7 (6.3)              | 10.0 (11.3)               | vs. 11.3 (11.2)            | −3.5 (−7.8 to −0.8)               | NR                                                |
|                            | VAS activity        | 4.1 (2.2)                 | vs. 3.6 (2.6)              | 3.5 (1.9)                 | vs. 2.9 (2.2)              | 0.20 (−0.47 to 0.86)              | NR                                                |
|                            | Global well-being   | 4.1 (2.5)                 | vs. 3.7 (3.0)              | 3.2 (2.0)                 | vs. 2.9 (2.3)              | 0.16 (−0.61 to 0.93)              | NR                                                |
|                            | Diarrhea:           |                           |                            |                           |                            |                                   |                                                   |
|                            | Bowel<br>symptoms   | 1.8 (2.6)                 | vs. 1.4 (2.3)              | 1.9 (2.7)                 | vs. 1.0 (1.7)              | 0.24 (−0.36 to 0.83)              | NR                                                |
|                            |                     | Stomach pain:             |                            |                           |                            |                                   |                                                   |
|                            |                     | 2.0 (2.7)                 | vs. 1.4 (2.2)              | 2.1 (2.6)                 | vs. 1.2 (1.6)              | 0.17 (−0.42 to 0.76)              | NR                                                |
|                            |                     | Blood in stools:          |                            |                           |                            |                                   |                                                   |
|                            |                     | 0.6 (1.6)                 | vs. 0.4 (1.1)              | 0.6 (1.8)                 | vs. 0.5 (1.6)              | −0.14 (−0.55 to 0.27)             | NR                                                |

Data are presented as the mean (standard deviation) except contrary mention.<sup>a</sup>  
 Data presented as number of patients (percentages). ASAS: Assessment of Spondyloarthritis International Society; ASQoL: Ankylosing Spondylitis Quality of Life; BASDAI: Bath Ankylosing Spondylitis Disease Activity Index; BASFI: Bath Ankylosing Spondylitis Functional Index; CRP: C-reactive Protein; NR: Not Reported; SJC: Swollen Joint Count; TJC: Tender Joint Count; VAS: Visual Analogic Scale.
